# Supplementary material for: Combination of cowpea mosaic virus (CPMV) intratumoral therapy and oxaliplatin chemotherapy
Source: Royal Society of Chemistry journal article supplement (doi:10.1039/d4ma00427b), 2024-01-01
Supplement: d4ma00427b1.pdf [file d4ma00427b1.pdf]

### Supporting Information for

## Combination of cowpea mosaic virus (CPMV) intratumoral therapy and oxaliplatin chemotherapy

Miguel A. Moreno-Gonzalez<sup>1,4,7</sup>, Zhongchao Zhao<sup>1,4,7</sup>, Adam A. Caparco<sup>1,4,5,8</sup>, and Nicole F. Steinmetz<sup>1-8\*</sup>

[1] Department of NanoEngineering, University of California San Diego, 9500 Gilman Dr., La Jolla, California 92093, United States

[2] Department of Bioengineering, University of California San Diego, 9500 Gilman Dr., La Jolla, California 92093, United States

[3] Department of Radiology, University of California San Diego, 9500 Gilman Dr., La Jolla, California 92093, United States

[4] Center for Nano-ImmunoEngineering, University of California San Diego, 9500 Gilman Dr., La Jolla, California 92093, United States

[5] Shu and K.C. Chien and Peter Farrell Collaboratory, University of California San Diego, 9500 Gilman Dr., La Jolla, California 92093, United States

[6] Center for Engineering in Cancer, Institute of Engineering in Medicine, University of California San Diego, 9500 Gilman Dr., La Jolla, California 92093, United States

[7] Moores Cancer Center, University of California, University of California San Diego, 9500 Gilman Dr., La Jolla, California 92093, United States

[8] Institute for Materials Discovery and Design, University of California San Diego, 9500 Gilman Dr., La Jolla, California 92093, United States

\* [nsteinmetz@ucsd.edu](mailto:nsteinmetz@ucsd.edu)

ORCID: <https://orcid.org/0000-0002-0130-0481>

**A**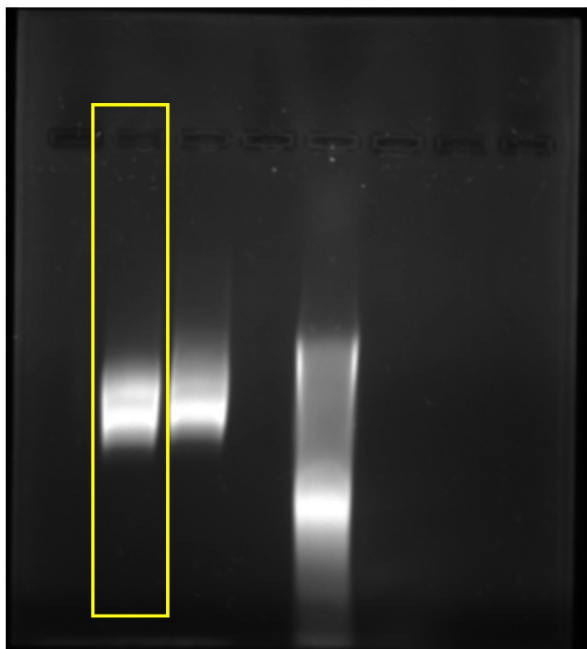**B**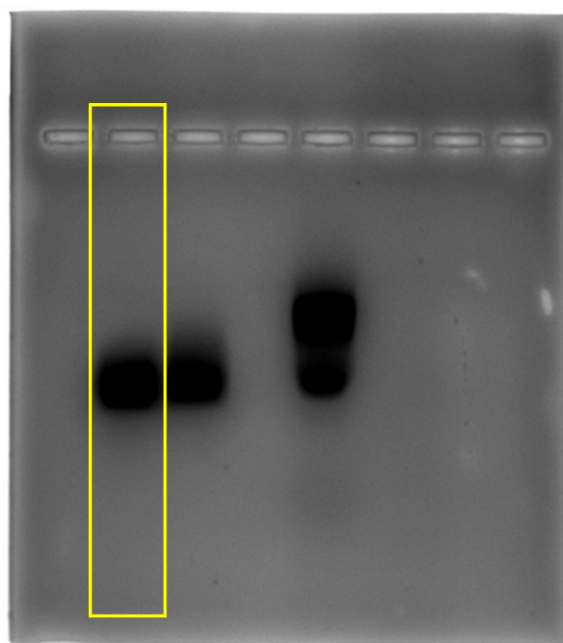

**Supporting Figure S1.** A) Agarose gel electrophoresis of CPMV RNA staining. B) Agarose gel electrophoresis of CPMV coat protein staining. Yellow rectangles highlight the CPMV particles used for this study.

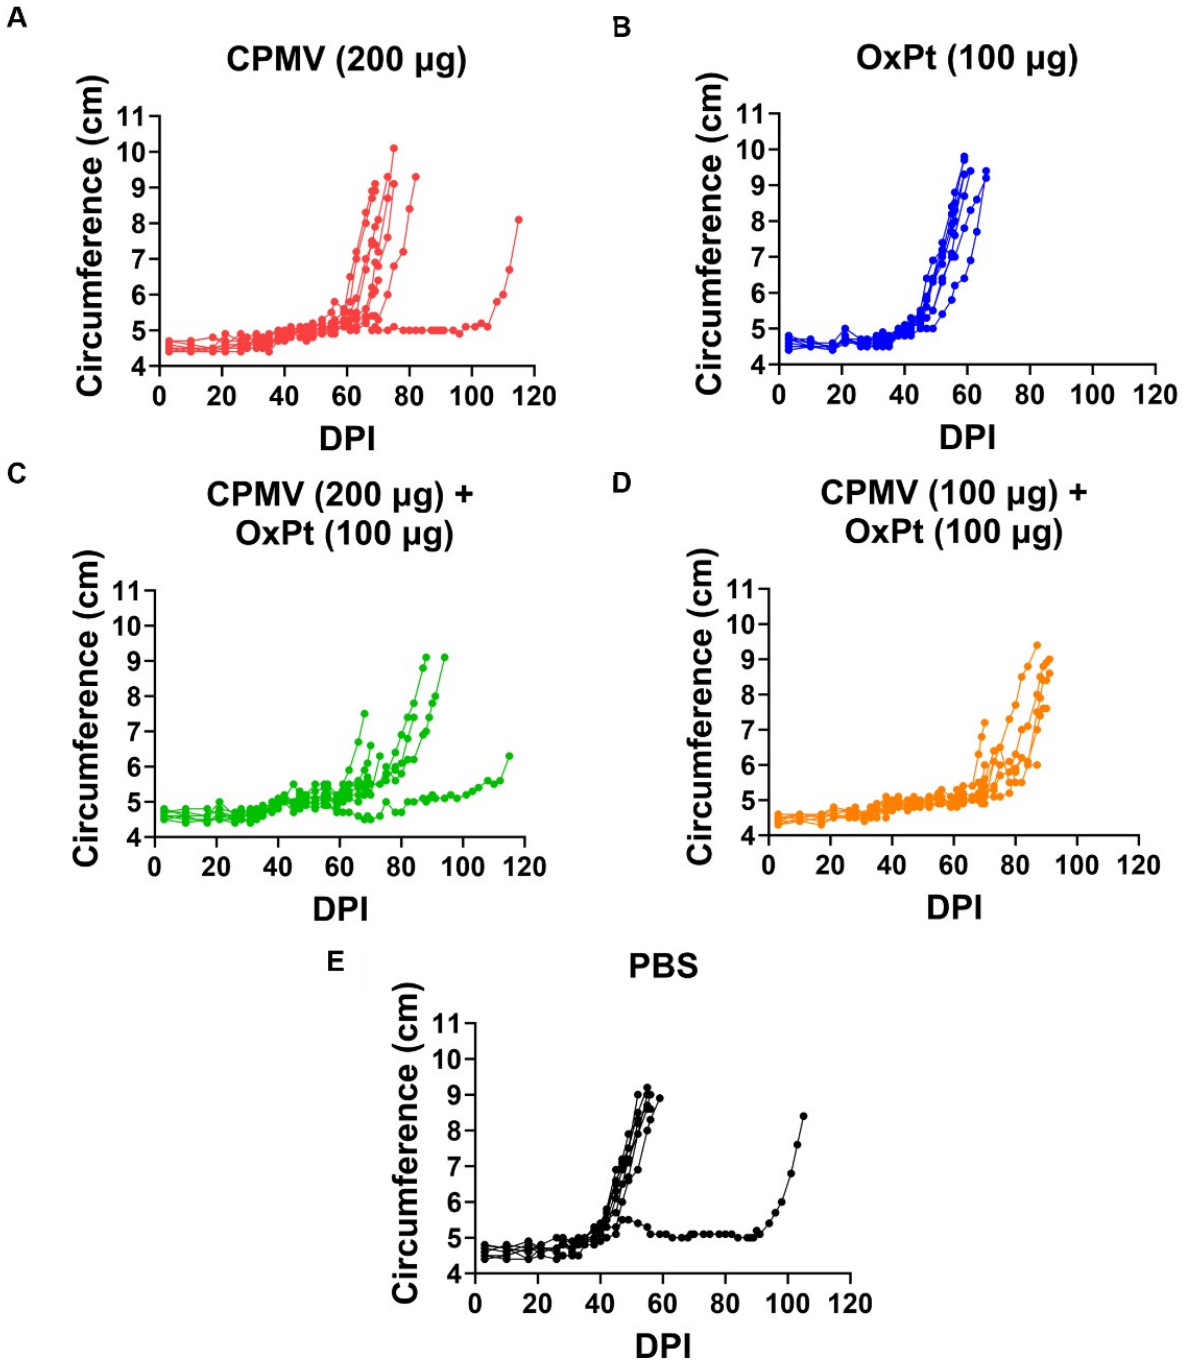

**Supporting Figure S2.** ID8-Defb29/Vegf-A tumor growth curves of individual groups with n = 8. A) CPMV monotherapy. B) Oxaliplatin monotherapy. C) High dose CPMV combination treatment. D) Low dose CPMV combination treatment. E) PBS.

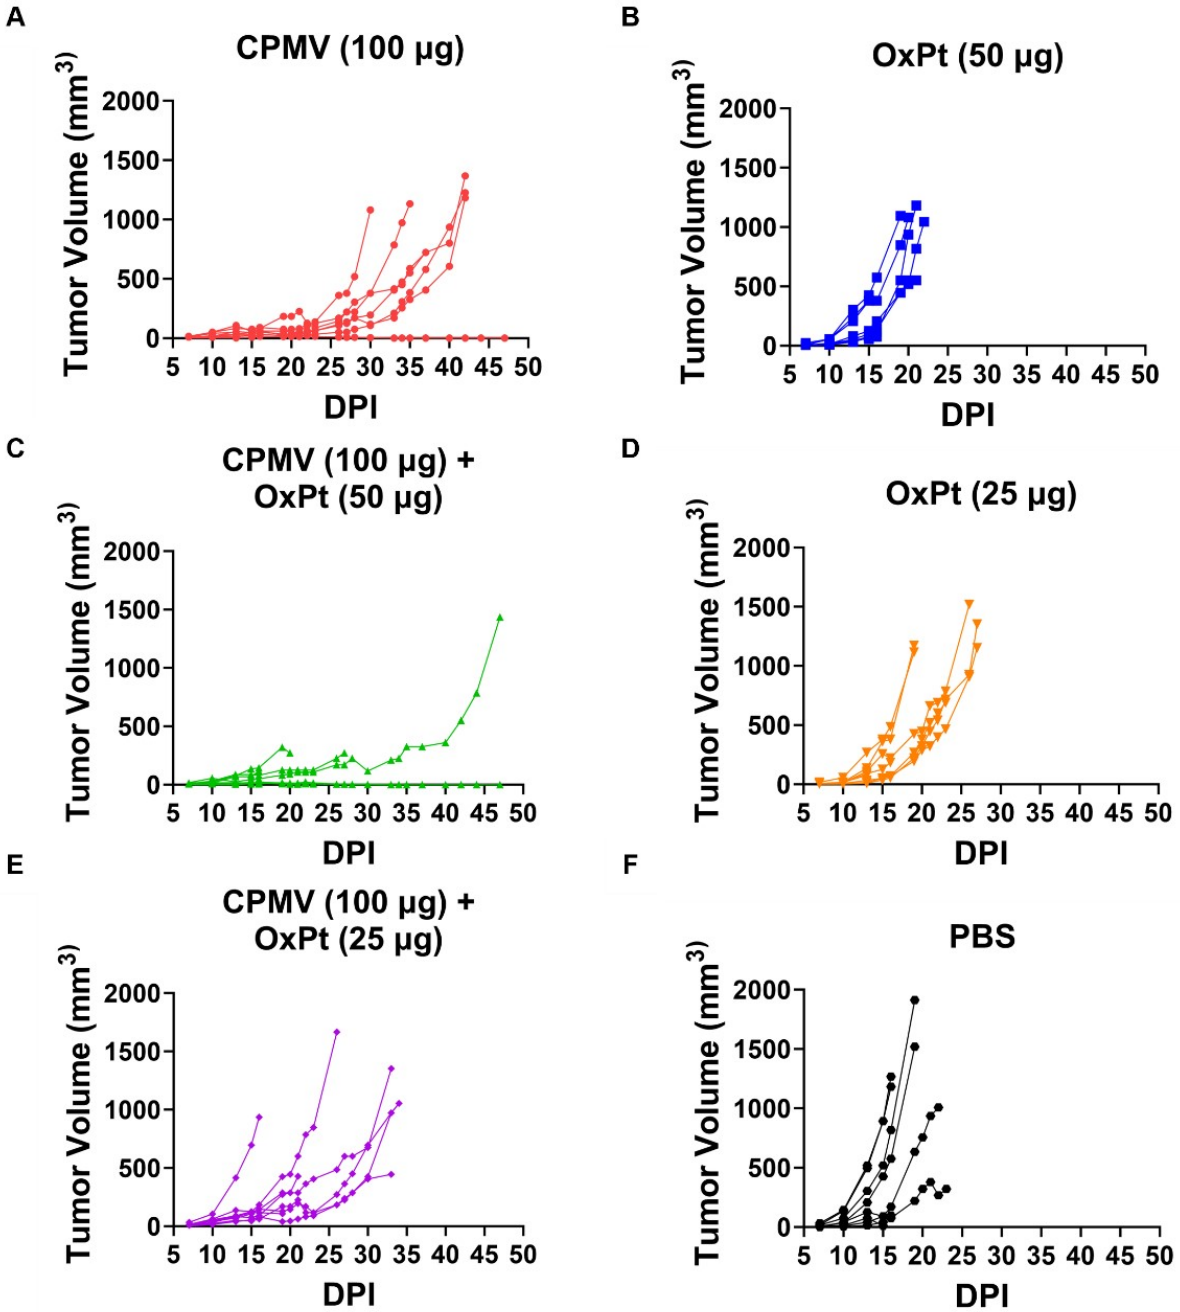

**Supporting Figure S3.** B16F10 tumor growth curves of individual groups with n = 8. A) CPMV monotherapy. B) High dose OxPt monotherapy. C) High dose OxPt combination treatment. D) Low dose oxaliplatin monotherapy. E) Low dose oxaliplatin combination treatment. F) PBS.

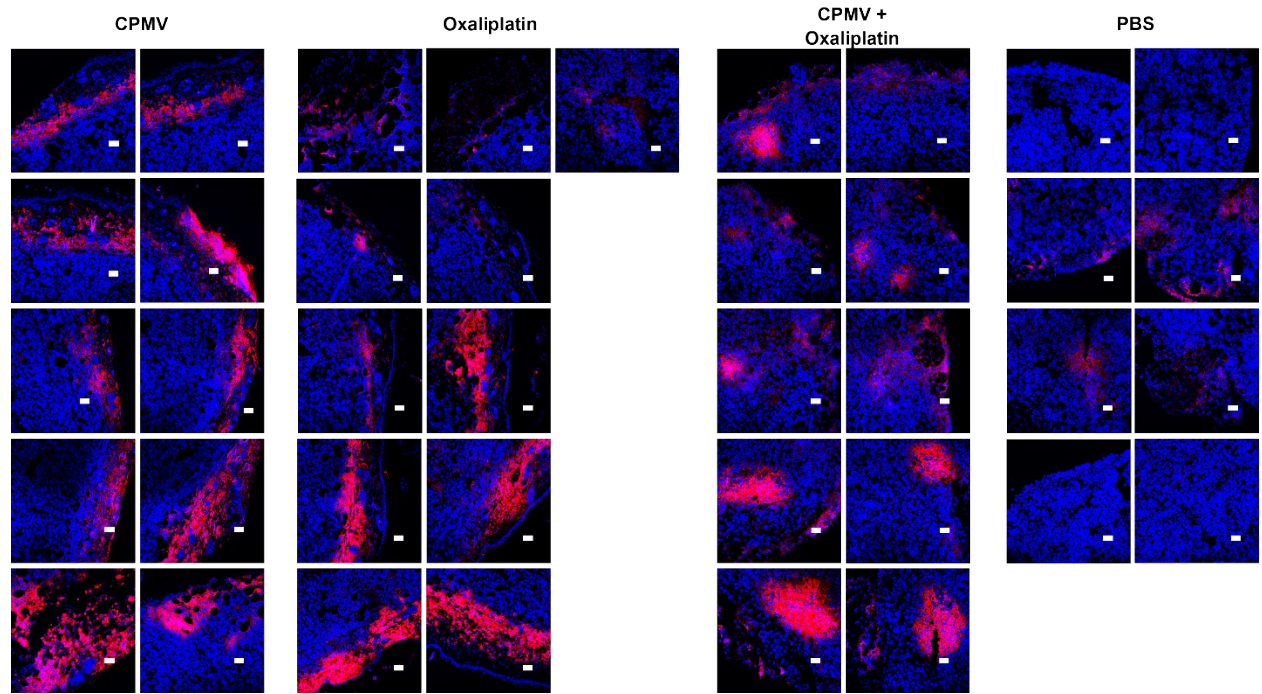

**Supporting Figure S4.** Myeloid cell confocal images used for quantitative analysis.

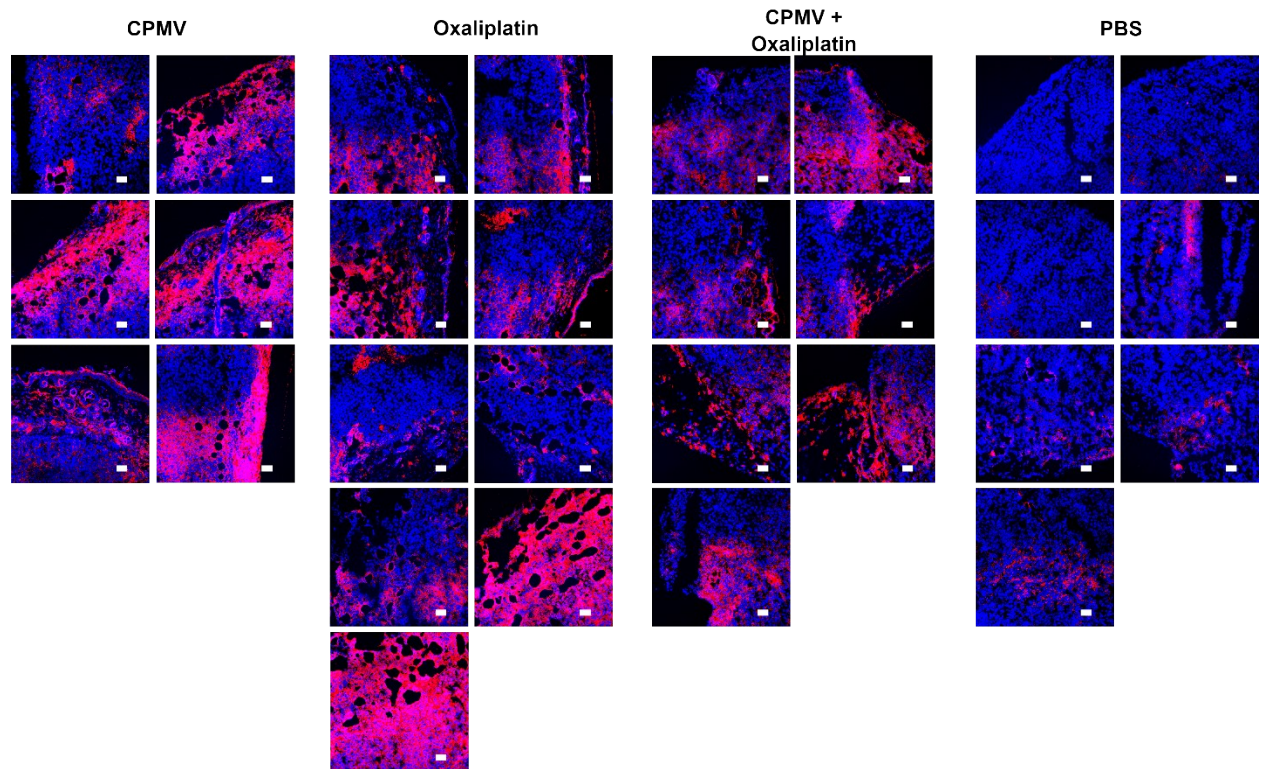

**Supporting Figure S5.** NK cell confocal images used for quantitative analysis.



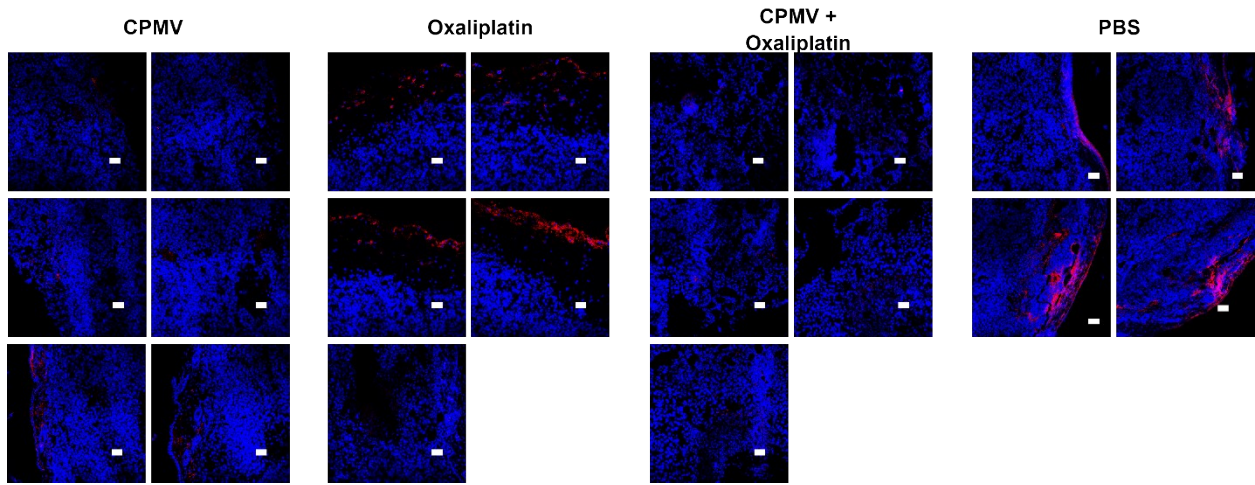

**Supporting Figure S8.** Treg confocal images used for quantitative analysis.

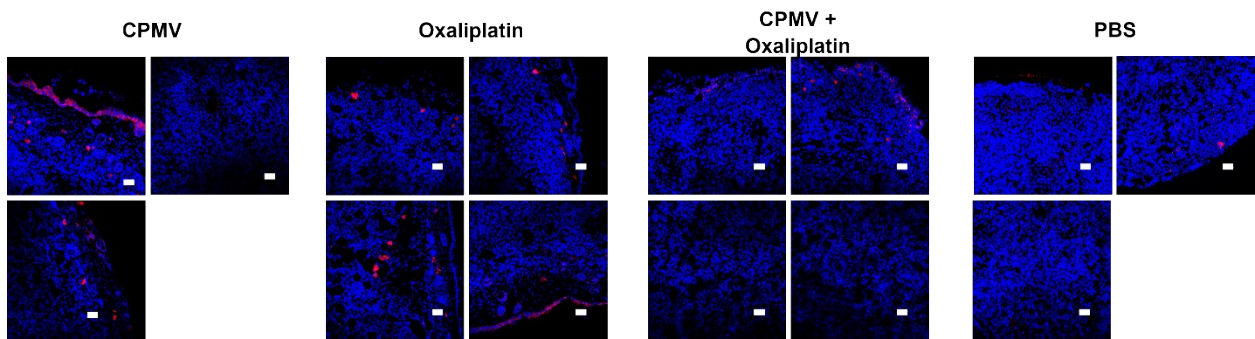

**Supporting Figure S9.** CD4 T cell confocal images used for quantitative analysis.

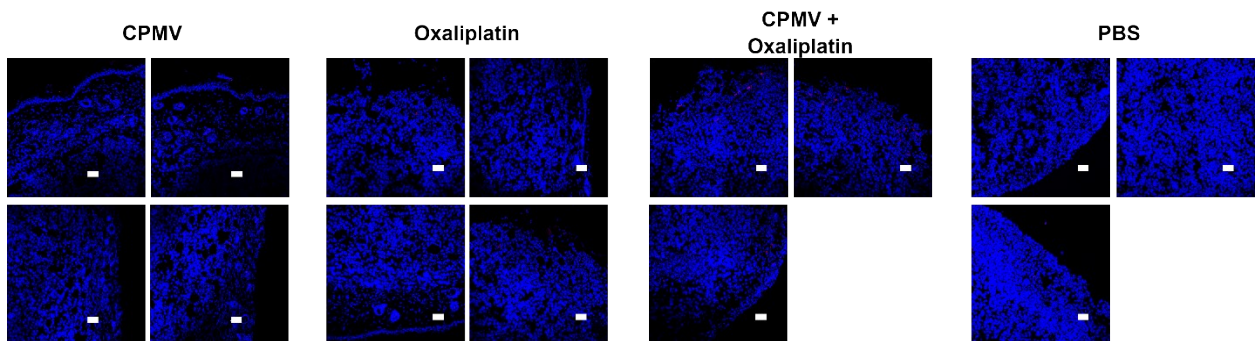

**Supporting Figure S10.** CD8 T cell confocal images used for quantitative analysis.

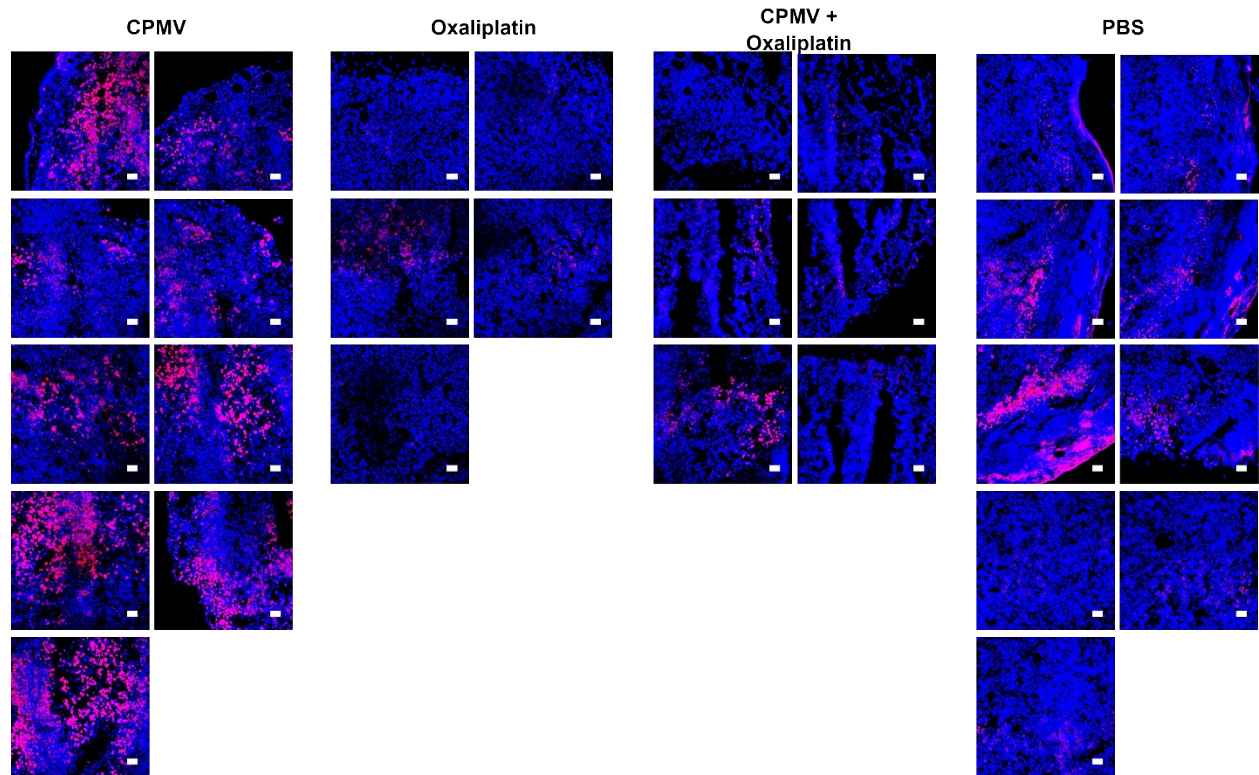

**Supporting Figure S11.** Proliferation confocal images used for quantitative analysis.

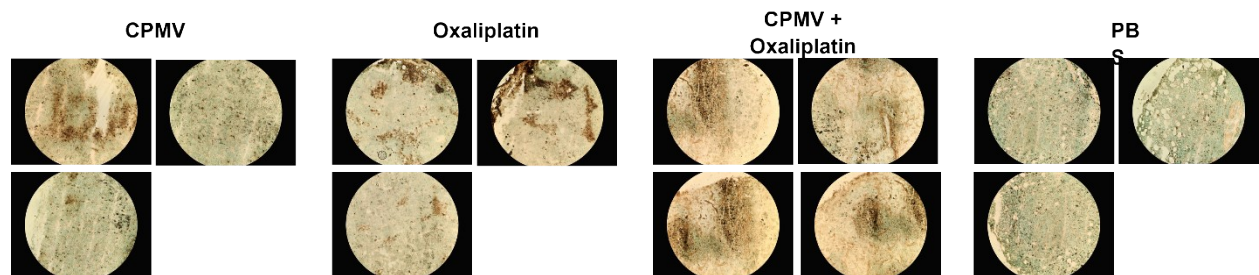

**Supporting Figure S12.** Apoptotic cell confocal images used for quantitative analysis.



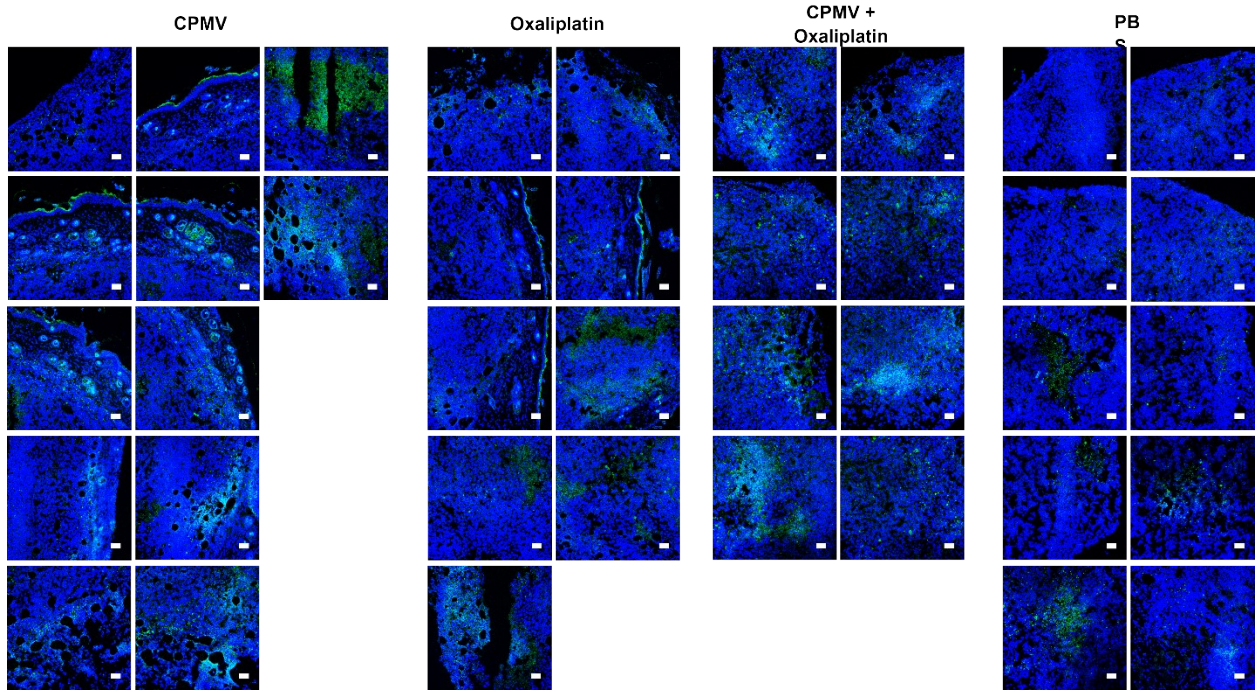

**Supporting Figure S13.** Calreticulin confocal images used for quantitative analysis.

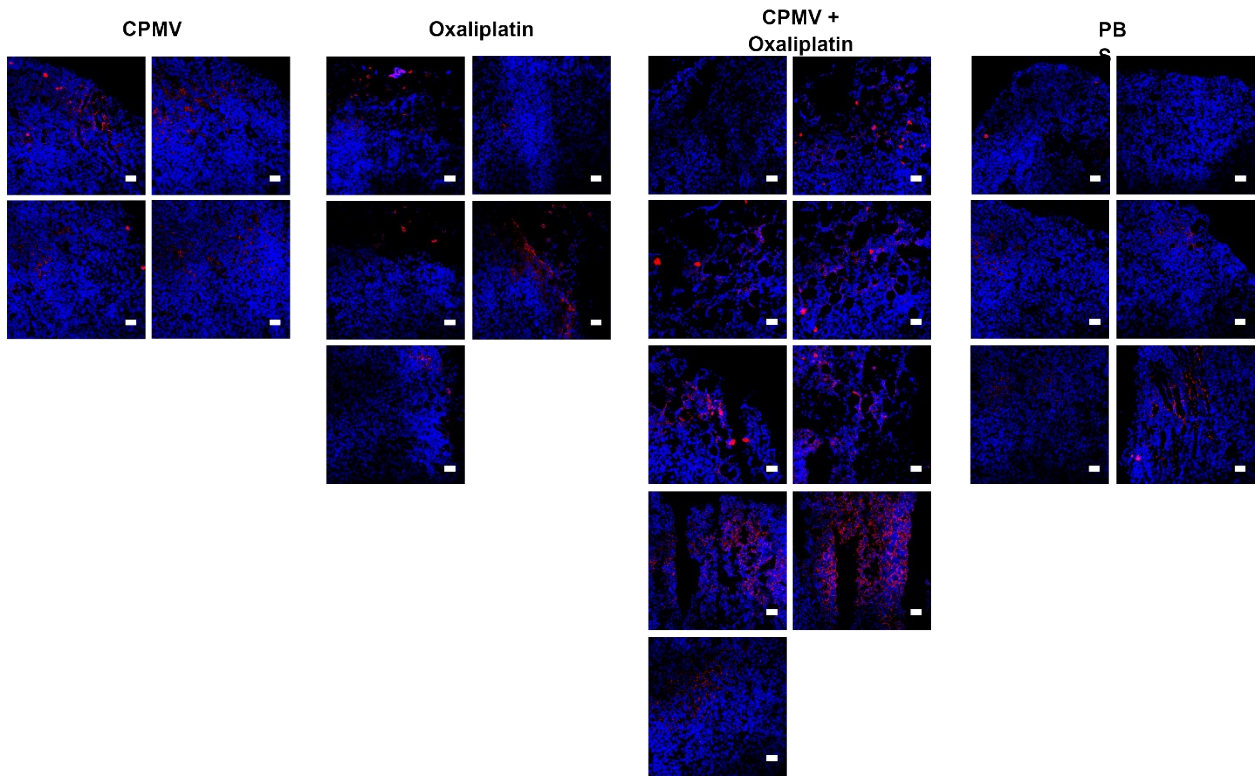

**Supporting Figure S14.** HMGB1 confocal images used for quantitative analysis.
